# Supplementary material for: Thermoresponsive 2-hydroxy-3-isopropoxypropyl hydroxyethyl cellulose with tunable LCST for drug delivery
Source: Royal Society of Chemistry journal article supplement (doi:10.1039/c8ra09075k), 2019-01-01
Supplement: c8ra09075k1.pdf [file c8ra09075k1.pdf]

## Electronic Supplementary Information

### Thermoresponsive 2-Hydroxy-3-Isopropoxypropyl Hydroxyethyl Cellulose with Tunable LCST for Drug Release

**Ye Tian,<sup>\*a,c</sup> Benzhi Ju<sup>b</sup>, Ying Liu,<sup>a</sup> Xiaozhong Ren<sup>a</sup>, Mingyun Dai<sup>a</sup>**

a. Dalian Ocean University, Aquacultural Engineering Research and Development Center, Dalian 116023, China.

b. State Key Laboratory of Fine Chemicals, Dalian University of Technology, Dalian 116023, China.

c. Key Laboratory of Mariculture & Stock Enhancement in North China's Sea, Dalian 116023, China.

Correspondence to

E-mail: [tianye@dlou.edu.cn](mailto:tianye@dlou.edu.cn) (Y. Tian); [jubenzhi@dlut.edu.cn](mailto:jubenzhi@dlut.edu.cn) (B. Ju)

## Supplementary data\_\_GPC Experimental

The molecular weights and molecular weight distribution of HIPEC were measured on an Agilent Technologies 1200 series gel permeation chromatograph equipped with two columns (ultrahydrogel 1000 7.8 mm×300 mm and ultrahydrogel 250 7.8 mm × 300 mm). Sample was dissolved in 1 mL of eluent (concentration 0.1%, w/w). Injection volume was 100  $\mu$ L. H<sub>2</sub>O was used as the eluent at a flow rate of 1 mL/min at 20 °C.

## Supplementary data\_\_<sup>1</sup>H-NMR, <sup>13</sup>C-NMR, and 2D HSQC NMR spectra

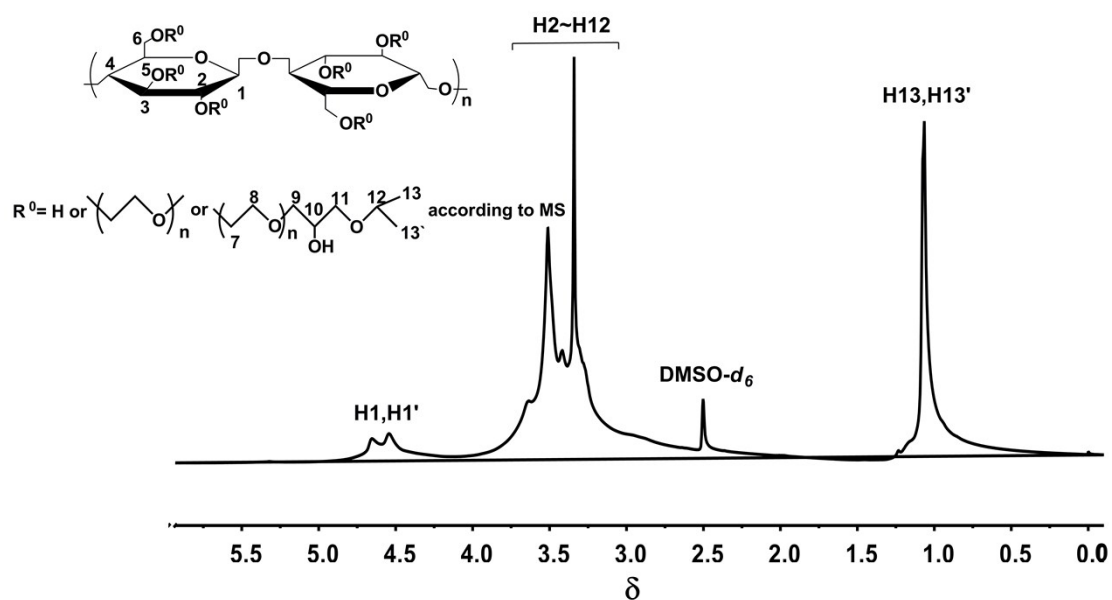

**Figure S1.** <sup>1</sup>H-NMR spectra of HIPEC-3 recorded in DMSO-*d*<sub>6</sub>

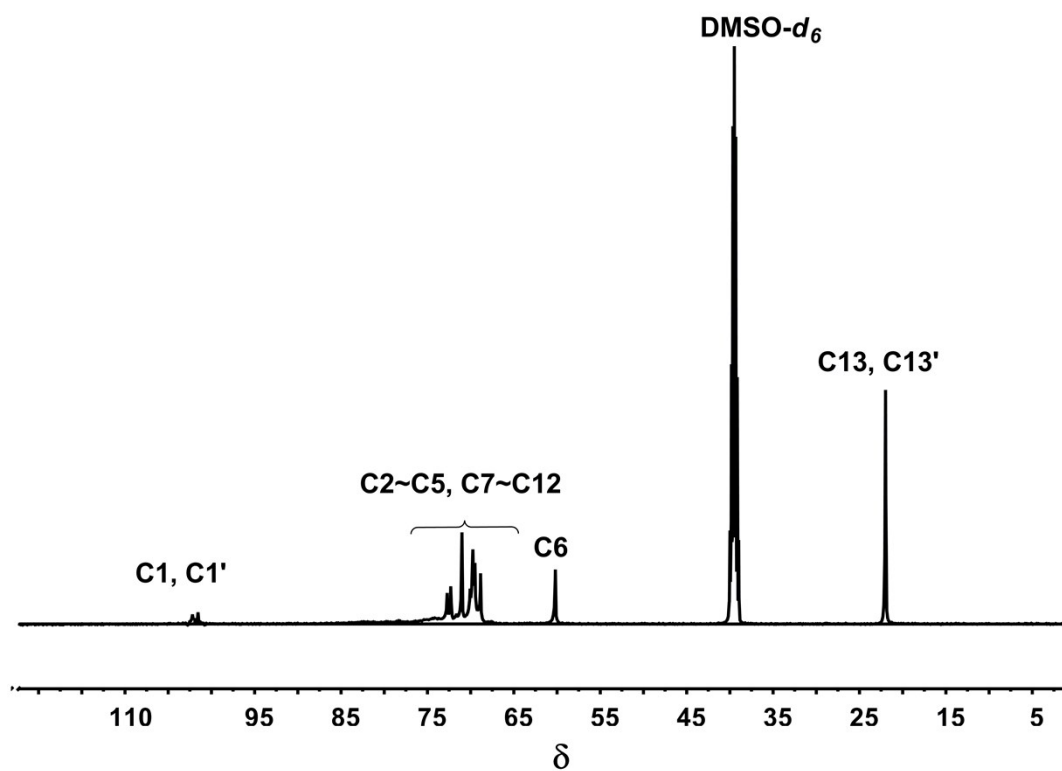

Figure S2.  $^{13}\text{C}$ -NMR spectra of HIPEC-3 recorded in  $\text{DMSO-}d_6$

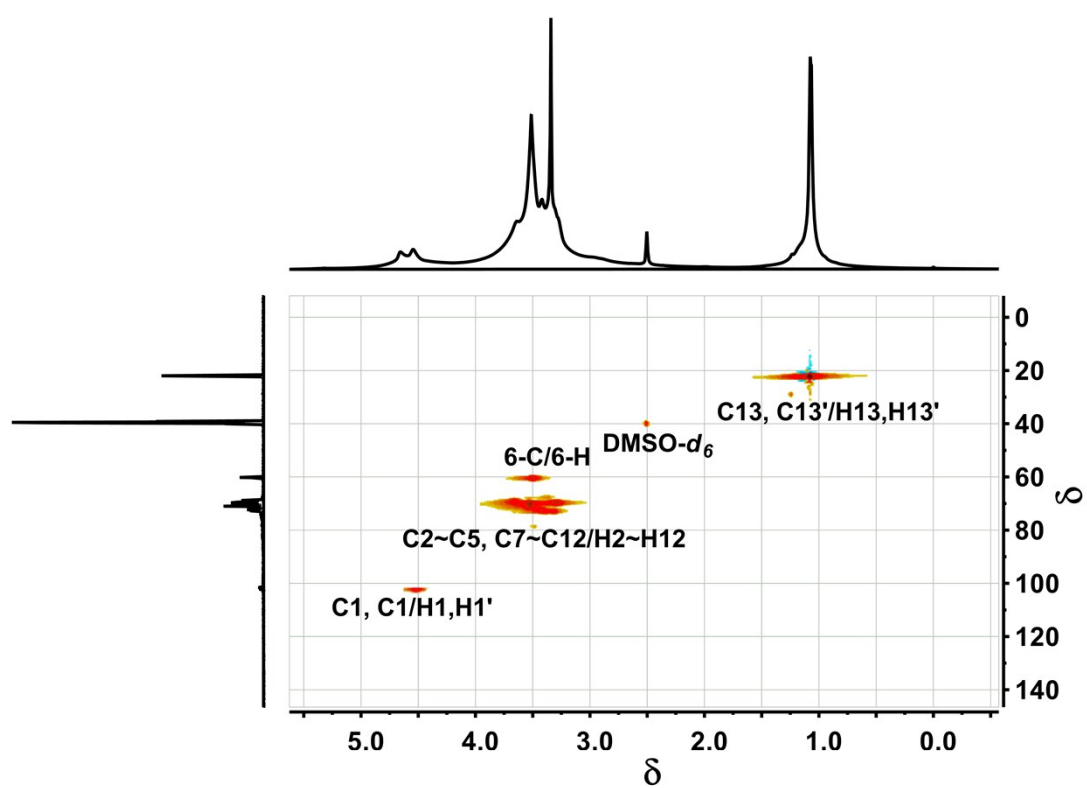

Figure S3. 2D HSQC NMR spectra of HIPEC-3 recorded in  $\text{DMSO-}d_6$
